# Supplementary material for: Chiral superstructure of aragonite similar to Turritella terebra shell induced by CTAB's adsorption chirality
Source: Royal Society of Chemistry journal article supplement (doi:10.1039/d2cc06615g), 2023-01-01
Supplement: d2cc06615g1.pdf [file d2cc06615g1.pdf]

## Electronic Supplementary Information

### **Chiral Superstructure of Aragonite Similar to *Turritella terebra* Shell Induced by CTAB's adsorption chirality**

Xin Yang<sup>a</sup>, Xun Liu<sup>a,d,\*</sup>, Fujun Yao<sup>a</sup>, Lingyuan Chen<sup>a</sup>, Wenyuan Hu<sup>b,d</sup>, Jiawen Li<sup>c</sup>, Zheng Kang<sup>c</sup>, Xiaohui Duan<sup>a</sup>, Chonghua Pei<sup>a\*</sup>

<sup>a</sup> *State Key Laboratory of Environment-Friendly Energy Materials, Southwest University of Science and Technology, Mianyang 621010, PR China.*

<sup>b</sup> *School of Material and Chemistry, Southwest University of Science and Technology, Mianyang 621010, PR China.*

<sup>c</sup> *Radioactive Waste Technology and Radiochemistry Research Department, China Nuclear Power Technology Research Institute Co., Ltd, Shenzhen, 518000, PR China.*

<sup>d</sup> *National Health Commission Key Laboratory of Nuclear Technology Medical Transformation, Mianyang Central Hospital, Mianyang 621010, P. R. China*

\*Corresponding authors.

Email addresses:

Xun Liu: liuxun@swust.edu.cn

Chonghua Pei : peichonghua@swust.edu.cn

**The Electronic Supplementary Information including experiments and characterizations, Figs. S1-S13, relevant explanations of some figures, Tables S1-S6, and References.**

## Table of Contents

(Arranging according to the sequence of relevant contents in the main text)

**Fig. S1 Molecular Structure Formula of CTAB**

**Text S1: Experiments and characterizations**

**Fig. S2 Schematic diagram of the experimental setup**

**Fig. S3 The influence of  $Mg^{2+}$  and CTAB concentration on the phase**

**Fig. S4 Mapping images of A- $CaCO_3$**

**Text S2: Effects of different  $Mg^{2+}$  and CTAB concentrations on crystal form**

**Fig. S5 Effects of different  $Mg^{2+}$  and CTAB concentrations on morphology**

**Text S3: Effects of different  $Mg^{2+}$  and CTAB concentrations on morphology**

**Fig. S6 SEM images of the two enantiomers of A- $CaCO_3$  (upper), and their horizontal triple magnification (down)**

**Fig. S7 CD Spectra of organic matter extracted from *Turritella terebra* Shell and *Turritella terebra* Shell without organic matter in it**

**Fig. S8 An asymmetric spherical crown structure**

**Fig. S9 HRTEM images of different crystal planes**

**Fig. S10 Adsorption simulation of CTAB molecules on different aragonite crystal planes (upper) and chiral enantiomers formed by absorption of CTAB molecules on (0 2 2) crystal planes (upward view) (down)**

**Fig. S11 Adsorption simulation of  $CTA^+$  on different aragonite crystal planes**

**Fig. S12 Adsorption simulation of OTAB molecules on different aragonite crystal planes**

**Fig. S13 Schematic diagram of the deviation of “daughter” particles as they adhere to “mother” particles as caused by adsorption chirality**

**Table S1 Binding energy and deformation energy of CTAB on different aragonite crystal planes**

**Table S2 Energy of CTAB adsorbed on calcium carbonate (0 2 2) crystal plane**

**Table S3 Energy of CTAB adsorbed on calcium carbonate (0 2 1) crystal plane**

**Table S4 Energy of CTAB adsorbed on calcium carbonate (0 1 2) crystal plane**

**Table S5 Bond length of different N-CH<sub>3</sub> bonds on the head group of CTA<sup>+</sup>**

**Table S6 Bond length of different N-CH<sub>3</sub> bonds on the head group of OTAB molecule**

**References**

**Fig. S1**

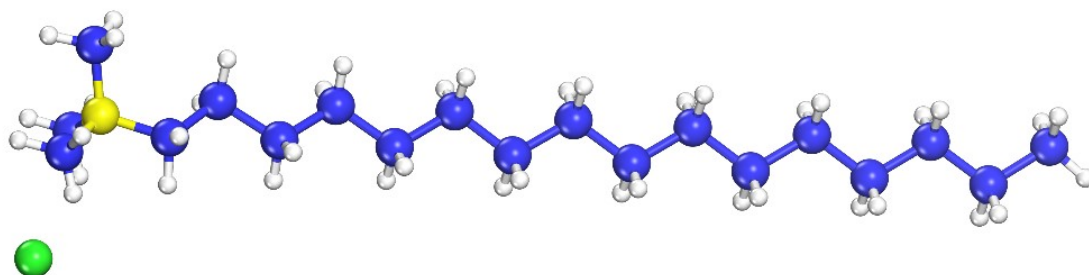

Fig. S1 Molecular Structure Formula of CTAB.

## **Text S1: Experiments and characterizations**

### **Experiments**

#### **Synthesize the twisted dumbbell-like pure aragonite.**

All chemicals used in the experiment, including CTAB, anhydrous  $\text{CaCl}_2$ ,  $\text{MgCl}_2 \cdot 6\text{H}_2\text{O}$ , anhydrous ethanol (purchased from Aladdin), and  $\text{NH}_4\text{HCO}_3$  (purchased from Chengdu Kelong Chemical Co., Ltd.), are analytical grade. Ultrapure water is self-made in the laboratory, with a resistivity of  $18.25 \text{ M}\Omega \cdot \text{cm}$ .

Gas diffusion was used to mineralize  $\text{CaCO}_3$ .<sup>1</sup> First, a mixed aqueous solution of  $\text{CaCl}_2$  and  $\text{MgCl}_2$  was prepared for standby. The concentration of  $\text{CaCl}_2$  was fixed at  $0.01 \text{ mol} \cdot \text{L}^{-1}$ , while for comparison that of  $\text{MgCl}_2$  was varied from  $0.01 \text{ mol} \cdot \text{L}^{-1}$  to  $0.04 \text{ mol} \cdot \text{L}^{-1}$ . An appropriate amount of CTAB was added to 100 mL of the above mixed aqueous solution. The mixture was next transferred into a smaller crystallizing dish ( $\Phi$  10 cm), which was then put into a larger crystallizing dish that contained 5 g of  $\text{NH}_4\text{HCO}_3$  ( $\Phi$  12 cm). The larger dish was sealed with plastic wrap secured by a rubber band. Mineralization was carried out at room temperature (about  $20 \text{ }^\circ\text{C}$ ) for a certain time. This improvised experimental device is shown in Fig. S2.

As necessary, liquid nitrogen was used to quickly cool the mixture during the reaction in order to investigate intermediate stages in the process. After the reaction was complete, the white precipitate at the bottom of the small crystallizing dish was filtered using suction, and the filtrate was cleaned 3-5 times using ultrapure water and absolute ethanol, respectively, and then freeze-dried for standby. The concentration of

CTAB varied from  $0 \text{ g}\cdot\text{L}^{-1}$  to  $10 \text{ g}\cdot\text{L}^{-1}$ .

### **Extraction of organic from *Turritella terebra* Shell.**

The protein in the shell was extracted by acid dissolution, which was divided into two steps: protein extraction and protein purification.<sup>2,3</sup>

Prepare 100 ml of 20 % acetic acid solution, and add dithiothreitol (DTT) to the solution to a concentration of 5 mM. Weigh 20 g of shell powder, and slowly add it into the prepared solution to avoid violent dissolution leading to explosive boiling of the solution. To protect the protein, all dissolution was carried out in a constant temperature bath at 4 °C. During dissolution,  $[\text{CH}_3\text{COO}^-] : [\text{Ca}^{2+}]$  was always larger than 2:1, and the solution was stirred for 72 h to ensure sufficient dissolution. Then, centrifuge the solution at 5000 rpm for 10 min to remove the partially dissolved shell powder and impurities. The supernatant was filtered by suction using an aqueous phase filter membrane of 0.45  $\mu\text{m}$  to remove insoluble organic matter. The filtrate was stored in a refrigerator at 4 °C for subsequent dialysis purification.

A dialysis bag with a length of 200 mm, a width of 77 mm and a retention molecular weight of 1000 D was used for protein purification. Before use, immerse the dialysis bag in 30% ethanol aqueous solution for 20 min, then clean the impurities on both sides of the dialysis bag, and then clean it with ultrapure water for three times, dry it naturally, put it into a self-sealing bag, and store it at room temperature. Before dialysis, soak the cleaned dialysis bag in ultrapure water for 5 minutes.

During dialysis, gloves should be used to avoid contamination. Clamp one end of the dialysis bag and ensure no leakage. Then, move the extracted solution into the dialysis bag, squeeze out the air above, clamp the other end of the dialysis bag, and check the sealing of the dialysis bag by squeezing. Put the dialysis bag into a beaker containing deionized water and perform dialysis at 4 °C. Change deionized water every four hours and repeat dialysis for five times to ensure the dialysis effect. After dialysis, take 10 ml of protein dialysate for qualitative analysis.

### **Preparation of *Turritella terebra* Shell without organic matter.**

In order to remove the organic matter in the *Turritella terebra* Shell, an anionic

surfactant Sodium dodecyl sulfate (SDS) was used.<sup>4, 5</sup> 10 mL SDS aqueous solution with mass fraction of 0~3% was prepared at room temperature, and then 0.2 g of crushed shell powder was added into the solution. Dissolution of organic matter was under stirring condition for 2 hours. After stirring, undissolved solid powder was filtered out by suction, and then cleaned with absolute ethanol for 2-3 times and with ultrapure water for 3-4 times in turn. Finally, freeze dry the sample for later use.

### **Characterizations**

The phase of the sample was analyzed using an X-ray diffractometer (Panaco, from the Netherlands). The working voltage and current were 40 kV and 40 mA respectively. Cu target K $\alpha$  radiation with a  $\lambda$  of 1.54187 Å was applied. The step interval was 0.03°, the scanning speed was 10°·min<sup>-1</sup>, and the scanning range was 3°-80°. The morphology and particle size of the CaCO<sub>3</sub> particles were characterized using a TESCAN MIRA3 (LMU) field emission scanning electron microscope (TESCAN Company, from the Czech Republic) under 10 kV accelerating voltage, and the samples were characterized by mapping with a high resolution cold field emission scanning microscope (Ultra55). During characterization, Au was plated on all sample surfaces to increase their conductivity. The samples were also tested using a Fourier transform infrared spectrometer FT-IR5700 (Bruker, from Germany). The content of CTAB in the CaCO<sub>3</sub> precipitate was determined using a synchronous thermal analyzer STA449FS (NETZSCH, from Germany) at temperatures ranging from ambient to 1000 °C. The microstructure of CaCO<sub>3</sub> was inspected using a JEOL JEM-100 CXII transmission electron microscope (TEM, from Japan) at 80 kV and room temperature. At room temperature, the samples were analyzed using a circular dichroism chromatograph J-1500 (JASCO, from Japan) at a working scanning rate of 50 nm·min<sup>-1</sup> and a data interval of 0.1 nm.

### **Statistics of twist direction**

With the aid of scanning electron microscope (with a magnification of 650), the distortion directions of 100 particles were counted. Among them, 33 particles could not be determined due to the angle of view. Among the 67 particles effectively counted,

there were 32 left-handed particles and 35 right-handed particles, with a ratio of about 1:1.

### Theoretical simulation

Establish aragonite cell, cut crystal planes (022), (021) and (012), and then expand them into  $6 \times 3$ ,  $6 \times 2$  and  $6 \times 2$  super crystal planes respectively. Construct the molecular model of CTAB,  $\text{CTA}^+$  and OTAB, then optimize their using molecular mechanics. The Adsorption Location module in the Materials Studio platform,<sup>6, 7</sup> the "Simulated annexing" simulation method, the "fine" precision, and the Compass force field are used for simulation. The calculation methods of static electricity and van der Waals force are respectively "Ewald" and "Atom based".

Fig. S2

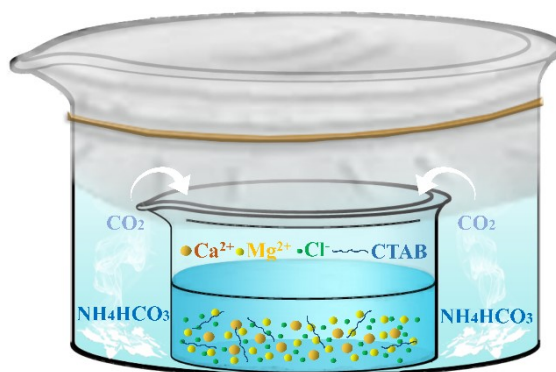

Fig. S2 Schematic diagram of the experimental setup.

Fig. S3

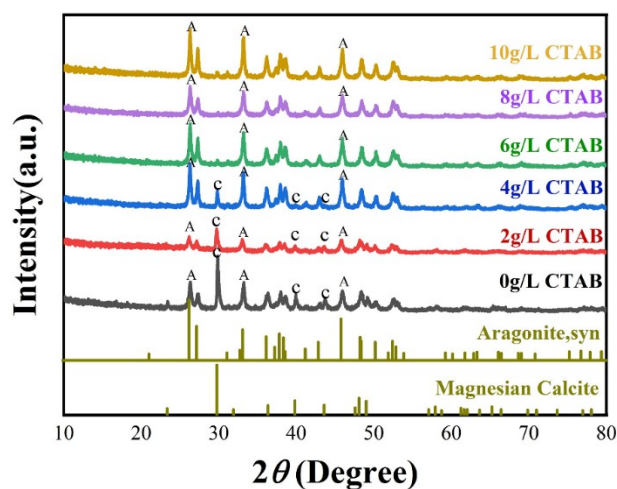

Fig. S3 The influence of  $\text{Mg}^{2+}$  and CTAB concentration on the phase.

**Fig. S4**

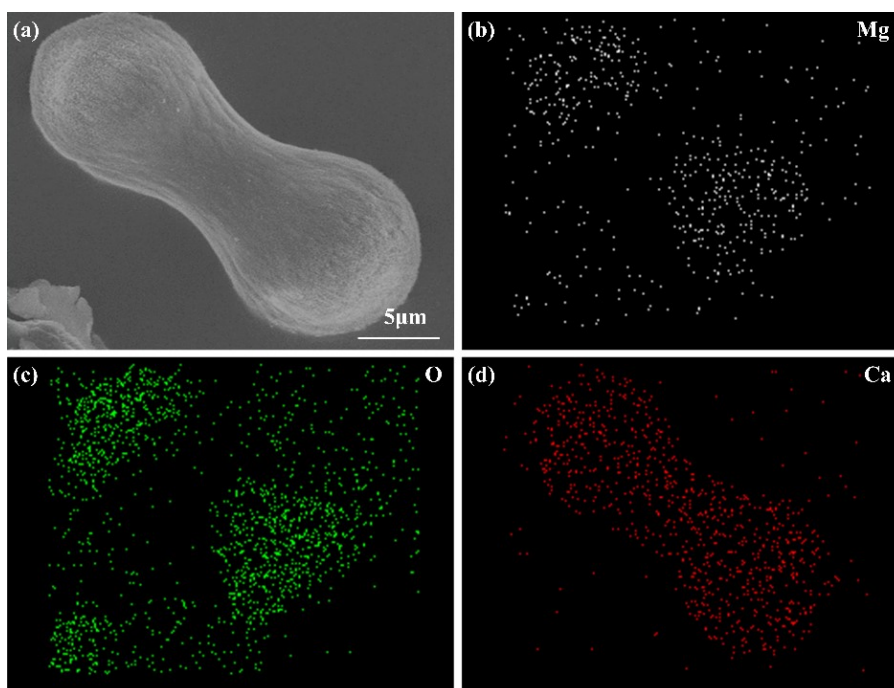

Fig. S4 Mapping images of A-CaCO<sub>3</sub>.

**Text S2: Effects of different Mg<sup>2+</sup> and CTAB concentrations on crystal form**

Coordinated regulation by Mg<sup>2+</sup> and CTAB, with Mg<sup>2+</sup> playing a dominant role, controls the formation of the aragonite. During the experiment, we compared the effects of different Mg<sup>2+</sup> and CTAB concentrations on the forms of the crystals in the mineralized products. If CTAB alone is used, a mixed phase of calcite and vaterite results at low concentrations of CTAB. As the concentration of CTAB increases, there is a gradual shift to pure vaterite (Fig. S3). If Mg<sup>2+</sup> is used, the aragonite phase forms, but a certain amount of calcite phase is mixed with it. If CTAB is added, calcite formation is inhibited to some extent, and a pure aragonite phase can be obtained in the end (Fig. S3). The mapping image shows that the Mg<sup>2+</sup> is evenly distributed in A-CaCO<sub>3</sub> (Fig. S4).



**Fig. S5**

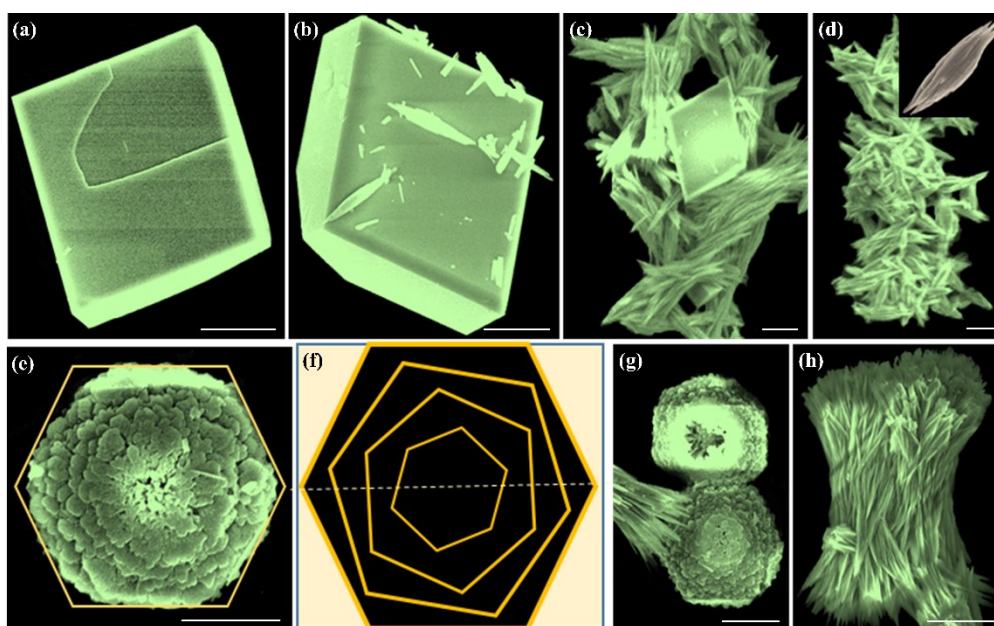

Fig. S5 (a-d) shows SEM images of mineralized particles induced by different concentrations of  $Mg^{2+}$  ((a), 0; (b),  $0.01 \text{ mol}\cdot\text{L}^{-1}$ ; (c),  $0.02 \text{ mol}\cdot\text{L}^{-1}$ ; (d),  $0.03 \text{ mol}\cdot\text{L}^{-1}$ ), (e), (g) and (h) are the SEM images of mineralized particles induced by different  $[Mg^{2+}]$  when CTAB concentration is  $6 \text{ g}\cdot\text{L}^{-1}$  ((e), 0; (g),  $0.01 \text{ mol}\cdot\text{L}^{-1}$ ; (h),  $0.03 \text{ mol}\cdot\text{L}^{-1}$ ), (f) is the simulation diagram of the rotational layers of vaterite assembly. The scale bar stands for  $5 \mu\text{m}$ .

### **Text S3: Effects of different $Mg^{2+}$ and CTAB concentrations on morphology**

If inductive factors are absent, the most common form of  $\text{CaCO}_3$  mineralization is rhombohedral calcite (Fig. S5a). If the amount of  $[Mg^{2+}]$  is gradually increased, acicular aragonite mineralized particles begin to appear when  $[Mg^{2+}]/[Ca^{2+}]$  is 1:1 (Fig. S5b), dominate at a ratio of 3:1 (Fig. S5c), and are the only form at a ratio of 4:1 (Fig. S5d). The enlarged insert in Fig. S5d shows that, when only  $Mg^{2+}$  is used, the acicular aragonite particles obtained are a relatively simple aggregate formed of several primary particles with a diameter of about  $100 \text{ nm}$  that has no chiral characteristics. Hexagonal layered vaterite (Fig. S5e) is obtained from mineralization induced by CTAB alone, and each layer rotates at a certain angle, forming a chiral structure (Fig. S5f). If a low

concentration of  $Mg^{2+}$  ( $[Mg^{2+}]/[Ca^{2+}]=1:1$ ) is added, a small amount of aragonite particles appear, and a higher-level assembly aggregation structure is formed (Fig. S5g). When  $[Mg^{2+}]/[Ca^{2+}]$  is 3:1, aragonite particle aggregates dominate, and the number of primary acicular aragonite particles constituting the aggregates increases significantly. As the diameter of the primary particle decreases and the length increases--that is, as the ratio of length to diameter increases--the primary particle assembly tends to distort (Fig. S5h). Therefore, the shape of the aragonite is mainly the result of  $Mg^{2+}$  regulation, but  $Mg^{2+}$  alone cannot form an assembly of multiple structures, nor do the results show chiral characteristics. For mineralized particles of both aragonite and vaterite, CTAB promotes chiral assembly.

**Fig. S6**

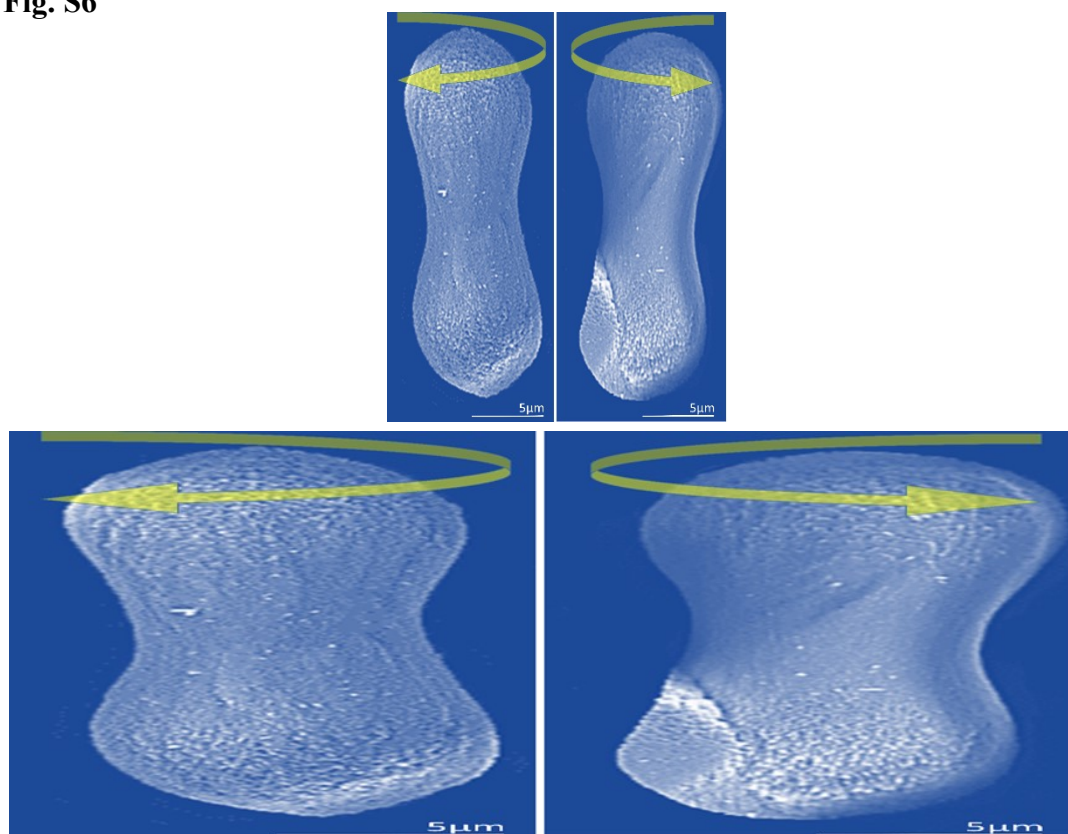

Fig. S6 SEM images of the two enantiomers of A-CaCO<sub>3</sub> (upper), and their horizontal triple magnification (down).

Fig. S7

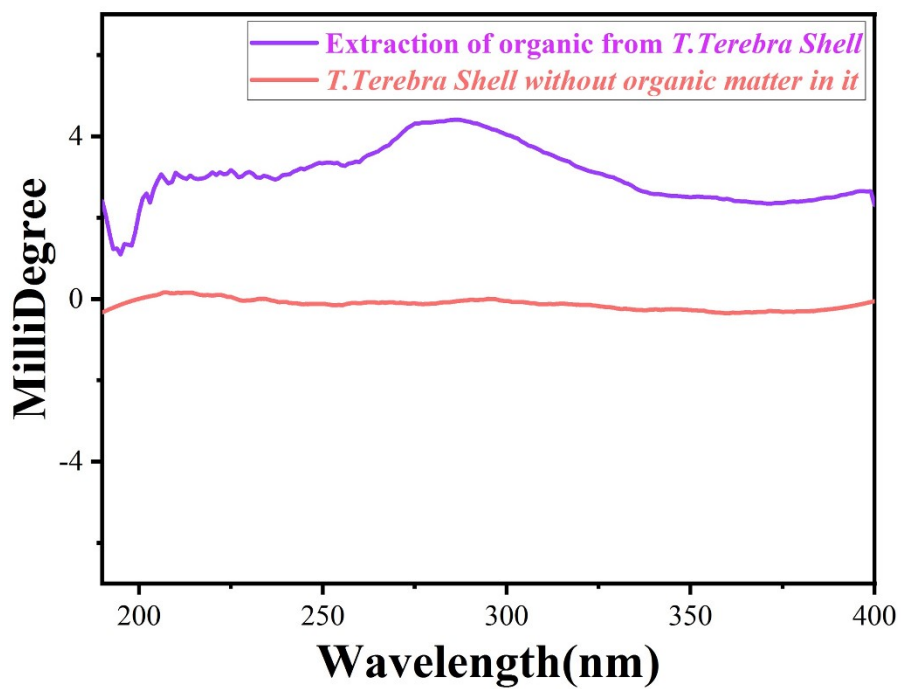

Fig. S7 CD Spectra of organic matter extracted from *Turritella terebra* Shell and *Turritella terebra* Shell without organic matter in it.

Fig. S8

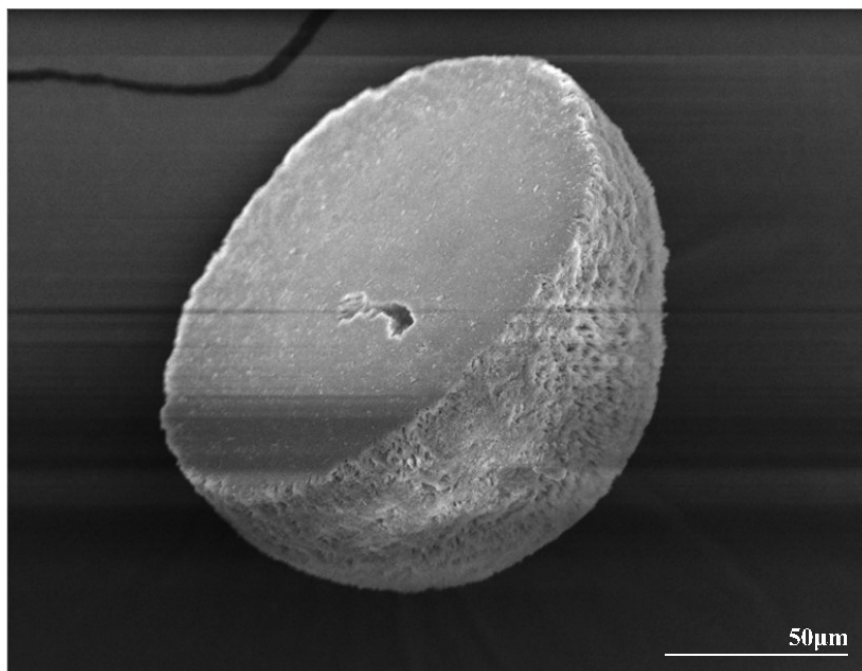

Fig. S8 An asymmetric spherical crown structure.

**Fig. S9**

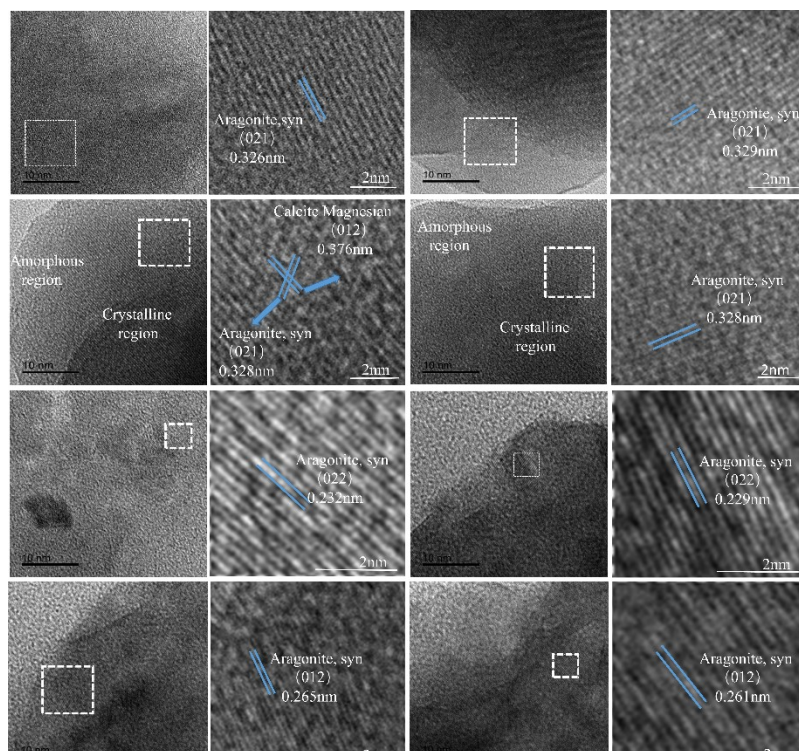

**Fig. S9** HRTEM images of different crystal planes.

**Fig. S10**

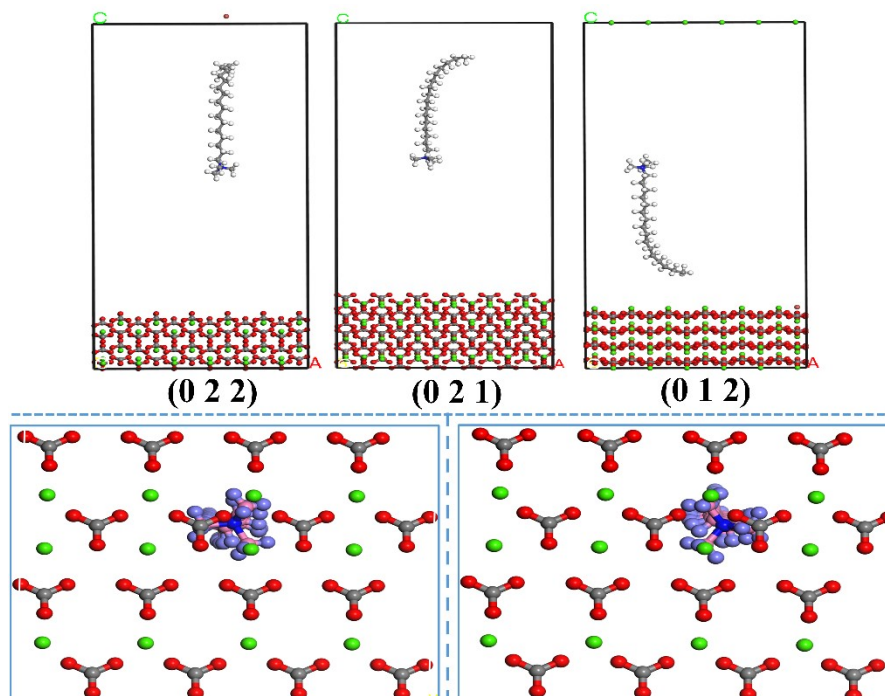

**Fig. S10** Adsorption simulation of CTAB molecules on different aragonite crystal planes (upper) and chiral enantiomers formed by absorption of CTAB molecules on (0 2 2) crystal planes (upward view) (down).

**Fig. S11**

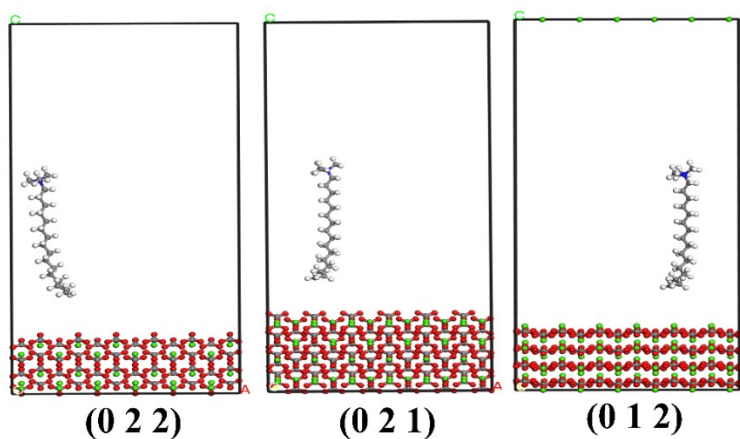

Fig. S11 Adsorption simulation of CTA<sup>+</sup> on different aragonite crystal planes.

**Fig. S12**

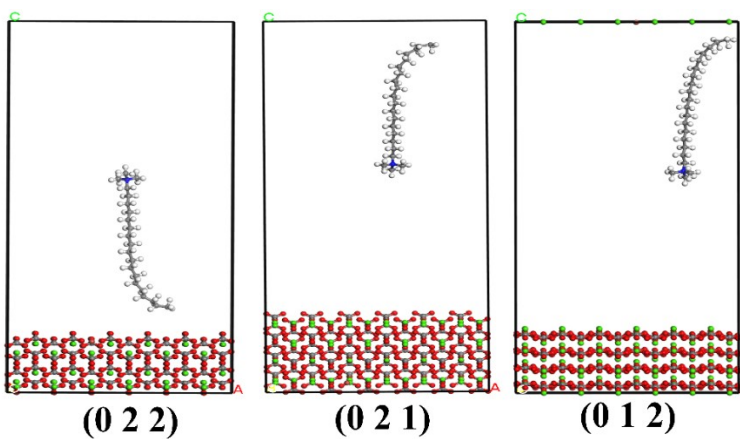

Fig. S12 Adsorption simulation of OTAB molecules on different aragonite crystal planes.

**Fig. S13**

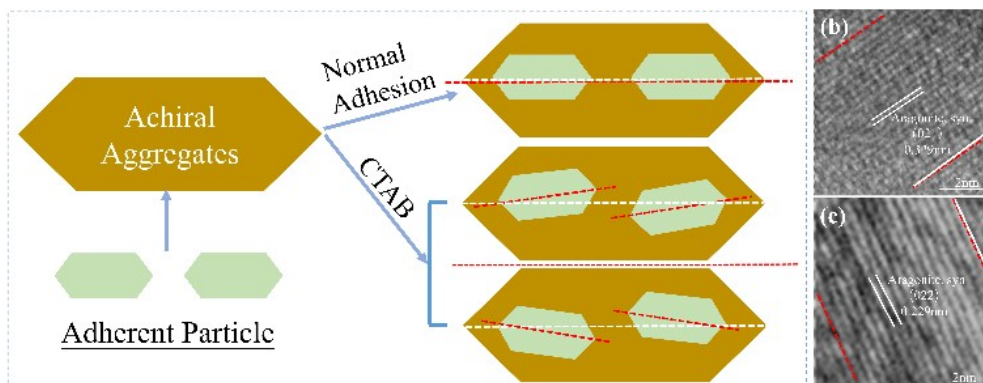

Fig. S13 (a) Schematic diagram of the deviation of “daughter” particles as they adhere to “mother” particles as caused by adsorption chirality (the size of the particles is not proportional to the real particles), and (b) and (c) HRTEM images of different crystal planes, In the (b) and (c) figures, the red solid line and the blue solid line are crystal planes at different positions, and the red dotted line is the translation line of the red solid line.

**Table S1**

Table S1 Binding energy and deformation energy of CTAB on different aragonite crystal planes.

| Energy             | (0 2 2)  | (0 2 1)  | (0 1 2)  |
|--------------------|----------|----------|----------|
| Binding energy     | -31167.8 | -41900.3 | -32406.8 |
| Deformation energy | 425.471  | 596.773  | 512.566  |

Note: All values are in  $\text{kJ}\cdot\text{mol}^{-1}$

**Table S2**

Table S2 Energy of CTAB adsorbed on aragonite (0 2 2) crystal plane.

| <b>Crystal planes</b>        | <b>Absorption energy(kJ·mol<sup>-1</sup>)</b> | <b>Rigid Absorption energy(kJ·mol<sup>-1</sup>)</b> | <b>Deformation energy(kJ·mol<sup>-1</sup>)</b> |
|------------------------------|-----------------------------------------------|-----------------------------------------------------|------------------------------------------------|
| CaCO <sub>3</sub> (0 2 2)-1  | -3.116732e+004                                | -3.159279e+004                                      | 425.47225031                                   |
| CaCO <sub>3</sub> (0 2 2)-2  | -3.116603e+004                                | -3.159967e+004                                      | 433.63437827                                   |
| CaCO <sub>3</sub> (0 2 2)-3  | -3.116453e+004                                | -3.160515e+004                                      | 440.61440485                                   |
| CaCO <sub>3</sub> (0 2 2)-4  | -3.116336e+004                                | -3.160549e+004                                      | 442.13616111                                   |
| CaCO <sub>3</sub> (0 2 2)-5  | -3.116180e+004                                | -3.160829e+004                                      | 446.48786429                                   |
| CaCO <sub>3</sub> (0 2 2)-6  | -3.115785e+004                                | -3.156097e+004                                      | 403.12626061                                   |
| CaCO <sub>3</sub> (0 2 2)-7  | -3.115644e+004                                | -3.157723e+004                                      | 420.78249979                                   |
| CaCO <sub>3</sub> (0 2 2)-8  | -3.115576e+004                                | -3.155667e+004                                      | 400.91003006                                   |
| CaCO <sub>3</sub> (0 2 2)-9  | -3.115509e+004                                | -3.157389e+004                                      | 418.79729002                                   |
| CaCO <sub>3</sub> (0 2 2)-10 | -3.114824e+004                                | -3.153988e+004                                      | 391.63804445                                   |

**Table S3**

Table S3 Energy of CTAB adsorbed on aragonite (0 2 1) crystal plane.

| <b>Crystal planes</b>        | <b>Absorption<br/>energy(kJ·mol<sup>-1</sup>)</b> | <b>Rigid Absorption<br/>energy(kJ·mol<sup>-1</sup>)</b> | <b>Deformation<br/>energy(kJ·mol<sup>-1</sup>)</b> |
|------------------------------|---------------------------------------------------|---------------------------------------------------------|----------------------------------------------------|
| CaCO <sub>3</sub> (0 2 1)-1  | -4.185818e+004                                    | -4.250862e+004                                          | 596.76907409                                       |
| CaCO <sub>3</sub> (0 2 1)-2  | -4.191059e+004                                    | -4.252256e+004                                          | 611.94541831                                       |
| CaCO <sub>3</sub> (0 2 1)-3  | -4.189443e+004                                    | -4.248312e+004                                          | 588.67414214                                       |
| CaCO <sub>3</sub> (0 2 1)-4  | -4.189150e+004                                    | -4.245445e+004                                          | 562.97027170                                       |
| CaCO <sub>3</sub> (0 2 1)-5  | -4.189041e+004                                    | -4.250426e+004                                          | 613.84607492                                       |
| CaCO <sub>3</sub> (0 2 1)-6  | -4.186191e+004                                    | -4.248045e+004                                          | 618.51062403                                       |
| CaCO <sub>3</sub> (0 2 1)-7  | -4.184411e+004                                    | -4.243110e+004                                          | 586.97716992                                       |
| CaCO <sub>3</sub> (0 2 1)-8  | -4.160643e+004                                    | -4.245290e+004                                          | 846.45986474                                       |
| CaCO <sub>3</sub> (0 2 1)-9  | -4.116460e+004                                    | -4.301548e+004                                          | 1850.85602655                                      |
| CaCO <sub>3</sub> (0 2 1)-10 | -4.101436e+004                                    | -4.203227e+004                                          | 1017.91791660                                      |



**Table S4**

Table S4 Energy of CTAB adsorbed on aragonite (0 1 2) crystal plane.

| Crystal planes               | Absorption energy(kJ·mol <sup>-1</sup> ) | Rigid Absorption energy(kJ·mol <sup>-1</sup> ) | Deformation energy(kJ·mol <sup>-1</sup> ) |
|------------------------------|------------------------------------------|------------------------------------------------|-------------------------------------------|
| CaCO <sub>3</sub> (0 1 2)-1  | -3.240989e+004                           | -3.292245e+004                                 | 512.56389019                              |
| CaCO <sub>3</sub> (0 1 2)-2  | -3.240520e+004                           | -3.290051e+004                                 | 495.30952171                              |
| CaCO <sub>3</sub> (0 1 2)-3  | -3.240430e+004                           | -3.289832e+004                                 | 494.01384551                              |
| CaCO <sub>3</sub> (0 1 2)-4  | -3.240246e+004                           | -3.290272e+004                                 | 500.25811709                              |
| CaCO <sub>3</sub> (0 1 2)-5  | -3.240088e+004                           | -3.289978e+004                                 | 498.90333634                              |
| CaCO <sub>3</sub> (0 1 2)-6  | -3.239998e+004                           | -3.290156e+004                                 | 501.57826547                              |
| CaCO <sub>3</sub> (0 1 2)-7  | -3.239729e+004                           | -3.289373e+004                                 | 496.44650375                              |
| CaCO <sub>3</sub> (0 1 2)-8  | -3.239590e+004                           | -3.287724e+004                                 | 481.34554034                              |
| CaCO <sub>3</sub> (0 1 2)-9  | -3.239525e+004                           | -3.287447e+004                                 | 479.22087025                              |
| CaCO <sub>3</sub> (0 1 2)-10 | -3.239340e+004                           | -3.287721e+004                                 | 483.81034344                              |

**Table S5**Table S5 Bond length of different N-CH<sub>3</sub> bonds on the head group of CTA<sup>+</sup>.

| Bond       | N1-C17(Å) | N1-C18(Å) | N1-C19(Å) |
|------------|-----------|-----------|-----------|
| Pure CTAB  | 1.50768   | 1.49963   | 1.49963   |
| (0 2 1)    | 1.50451   | 1.49904   | 1.49932   |
| Difference | -0.00317  | -0.00059  | -0.00031  |
| (0 2 2)    | 1.50539   | 1.49943   | 1.49940   |
| Difference | -0.00229  | -0.0002   | -0.00023  |
| (0 1 2)    | 1.50514   | 1.49963   | 1.49974   |
| Difference | -0.00254  | 0         | 0.00011   |

**Table S6**Table S6 Bond length of different N-CH<sub>3</sub> bonds on the head group of OTAB molecule.

| <b>Bond</b> | <b>N1-C19(Å)</b> | <b>N1-C20(Å)</b> | <b>N1-C21(Å)</b> |
|-------------|------------------|------------------|------------------|
| Pure OTAB   | 1.50836          | 1.50032          | 1.49265          |
| (0 2 1)     | 1.50050          | 1.49936          | 1.50533          |
| Difference  | -0.00786         | -0.00096         | 0.01268          |
| (0 2 2)     | 1.49986          | 1.49973          | 1.50691          |
| Difference  | -0.0085          | -0.00059         | 0.01426          |
| (0 1 2)     | 1.50111          | 1.50031          | 1.50811          |
| Difference  | -0.00725         | -0.00001         | 0.01546          |

## Reference

- 1 M. B. Gindele, L. V. Steingrube, D. Gebauer, *CrystEngComm*, 2021, **23**, 7938-7943.
- 2 J. W. Morse, R. S. Arvidson, A. Luttge, *Chem. Rev.*, 2007, **107**, 342-381.
- 3 M. Aoki, T. Matsuda, Y. Tomo, Y. Miyata, M. Inoue, T. Kigawa, S. Yokoyama, *Protein Expression Purif.*, 2009, **68**, 128-136.
- 4 B. B. Mandal, S. C. Kundu, *Biotechnol Bioeng*, 2008, **99**, 1482-1489.
- 5 C. La Mesa, *J. Colloid Interface Sci.*, 2005, **286**, 148-157.
- 6 R. L. C. Akkermans, N. A. Spenley, S. H. Robertson, *Mol. Simul.*, 2013, **39**, 1153-1164.
- 7 T. Semoto, Y. Tsuji, K. Yoshizawa, *Bull. Chem. Soc. Jpn.*, 2012, **85**, 672-678.
